# Supplementary material
Source: PubMed Central journal article supplement (PMC8757570)
Supplement: NEJMoa2116846_appendix.pdf [file NEJMoa2116846_appendix.pdf]

## Supplementary Appendix

Supplement to: Gottlieb RL, Vaca CE, Paredes R, et al. Early remdesivir to prevent progression to severe Covid-19 in outpatients. N Engl J Med. DOI: 10.1056/NEJMoa2116846

This appendix has been provided by the authors to give readers additional information about the work.

Supplementary Appendix to: **Early Outpatient Remdesivir to Prevent Progression to Severe  
Covid-19**

**Table of Contents:**

GS-US-540-9012 Study Investigators by Country .....2

GS-US-540-9012 Research and Support Team Members .....6

Figure S1. Patient Disposition .....9

Figure S2. Kaplan-Meier Estimate of Time to Symptom Alleviation as Reported by  
Covid-19-adapted FLU-PRO Questionnaire.....10

Figure S3. Mean (95% CI) Change from Baseline in Nasopharyngeal SARS-CoV-2  
Viral Load by Visit Day.....12

Table S1. Patient demographics, hospitalization data, and outcomes over the course  
of available follow-up.....13

Table S2. Representativeness of Study Participants.....15

References.....16

## GS-US-540-9012 Study investigators by country

### Denmark

| Principal Investigator | Site                                                                                        |
|------------------------|---------------------------------------------------------------------------------------------|
| Thomas Benfield        | Amager Hvidovre Hospital<br>Hvidovre, Denmark                                               |
| Jan Gerstoff           | Copenhagen University Hospital - Rigshospitalet<br>Copenhagen, Denmark                      |
| Isik Somuncu Johansen  | Odense University Hospital and University of Southern<br>Denmark<br>Odense C, South Denmark |
| Henrik Nielsen         | Aalborg Universitetshospital<br>Aalborg, Denmark                                            |
| Nina Stærke            | Aarhus Universitetshospital<br>Aarhus, Denmark                                              |

### Spain

| Principal Investigator | Site                                                            |
|------------------------|-----------------------------------------------------------------|
| Roger Paredes Deiros   | Hospital Universitari Germans Trias i Pujol<br>Barcelona, Spain |
| Pablo Ryan Murua       | Hospital Universitario Infanta Leonor<br>Madrid, Spain          |

### United Kingdom

| Principal Investigator | Site                                                                      |
|------------------------|---------------------------------------------------------------------------|
| Michael Brown          | University College London Hospitals<br>London, United Kingdom             |
| Dinesh Saralaya        | Patient Recruitment Centres (PRCs) - Bradford<br>Bradford, United Kingdom |

### United States

| Principal Investigator | Site                                                  |
|------------------------|-------------------------------------------------------|
| Matthew Abinante       | Elevated Health<br>Huntington Beach, California       |
| Igor Abolnik           | St. Joseph Heritage Healthcare<br>Eureka, CA          |
| Atoya Adams            | AB Clinical Trials - Hunt - PPDS<br>Las Vegas, Nevada |
| Paul Benson            | Be Well Medical Center<br>Berkeley, Michigan          |
| Daniel Berger          | Northstar Medical Center<br>Chicago, Illinois         |

**United States (continued)**

| <b>Principal Investigator</b> | <b>Site</b>                                                                                                                                                                                  |
|-------------------------------|----------------------------------------------------------------------------------------------------------------------------------------------------------------------------------------------|
| Cynthia Brinson               | Central Texas Clinical Research<br>Austin, Texas                                                                                                                                             |
| John Cafardi                  | The Christ Hospital<br>Cincinnati, Ohio                                                                                                                                                      |
| Vasundhara Cheekati           | Agile Clinical Research Trials, LLC<br>Atlanta, Georgia                                                                                                                                      |
| Paul Cook                     | East Carolina University<br>Greenville, North Carolina                                                                                                                                       |
| Gordon Crofoot                | The Crofoot Research Facility<br>Houston, Texas                                                                                                                                              |
| Frederick Cruickshank         | Rosedale Infectious Diseases<br>Huntersville, North Carolina                                                                                                                                 |
| Marcia Epstein                | Northwell Health<br>Manhasset, New York                                                                                                                                                      |
| Augusto Focil                 | FOMAT Medical Research - FOMAT - HyperCore - PPDS<br>Oxnard, California                                                                                                                      |
| Brad Frandsen                 | Sound Medical Research<br>Port Orchard, Washington                                                                                                                                           |
| Bernard Garcia                | Invesclinic, LLC<br>Fort Lauderdale, Florida                                                                                                                                                 |
| Juan Garza                    | VIP Trials<br>San Antonio, Texas                                                                                                                                                             |
| Erika Gonzalez                | STAAMP Research, LLC - CRN - PPDS<br>San Antonio, Texas                                                                                                                                      |
| Linda Gorgos                  | AXCES Research Group<br>Santa Fe, New Mexico                                                                                                                                                 |
| Robert L Gottlieb             | Baylor University Medical Center<br>Dallas, Texas<br><br>Baylor Scott & White Medical Center – Hillcrest<br>Waco, Texas<br><br>Baylor Scott & White Medical Center – Irving<br>Irving, Texas |
| Enrique Hanabergh             | L&C Professional Medical Research Institute<br>Miami, Florida                                                                                                                                |
| Ausberto Hidalgo              | Luminous Clinical Research<br>Miami, Florida                                                                                                                                                 |

**United States (continued)**

| <b>Principal Investigator</b> | <b>Site</b>                                                                     |
|-------------------------------|---------------------------------------------------------------------------------|
| Joshua Hill                   | Fred Hutchinson Cancer Research Center<br>Seattle, Washington                   |
| Rudolf Kotula                 | Quality Clinical Research - HyperCore - PPDS<br>Omaha, Nebraska                 |
| Kelly Lannutti                | South Shore Hospital<br>South Weymouth, Massachusetts                           |
| Thomas Ledbetter              | ClinPoint Trials LLC - ClinEdge - PPDS<br>Waxahachie, Texas                     |
| Ramon Leon                    | IMIC Inc.<br>Palmetto Bay, Florida                                              |
| Michael Marsh                 | Med Partners, Inc. dba Premiere Medical<br>Toluca Lake, California              |
| Henry Mendoza                 | Onyx Clinical Research<br>Flint, Michigan                                       |
| Jorge Mera                    | Cherokee Nation<br>Talequah, Oklahoma                                           |
| Anthony Mills                 | Mills Clinical Research at Men's Health Foundation<br>Los Angeles, California   |
| Shilpi Mittal                 | Care United Research, LLC<br>Forney, Texas                                      |
| Godson Oguchi                 | Midland Florida Clinical Research Center LLC<br>Deland, Florida                 |
| Olayemi Osiyemi               | Triple O Research Institute PA<br>West Palm Beach, Florida                      |
| David Park                    | St. Joseph Heritage Healthcare<br>Fullerton, California                         |
| Jesse Penico                  | Memorial Hospital at Gulfport<br>Gulfport, Mississippi                          |
| Gilberto Perez                | Evolution Clinical Research (Hialeah Gardens)<br>Hialeah Gardens, Florida       |
| Rodolfo Perez                 | Encore Medical Research, LLC<br>Hollywood, Florida                              |
| Gerald Pierone, Jr.           | AIDS Research and Treatment Center of the Treasure Coast<br>Vero Beach, Florida |
| Christopher Polk              | Atrium Health<br>Charlotte, North Carolina                                      |
| Moti Ramgopal                 | Midway Immunology and Research Center<br>Fort Pierce, Texas                     |

**United States (continued)**

| <b>Principal Investigator</b> | <b>Site</b>                                                     |
|-------------------------------|-----------------------------------------------------------------|
| Yessica Sachdeva              | Arizona Liver Health<br>Mesa, Arizona                           |
| Arun Sanyal                   | Virginia Commonwealth University<br>Richmond, Virginia          |
| Sorana Segal-Maurer           | New York-Presbyterian-Queens<br>Flushing, New York              |
| Nirav Shah                    | NorthShore University HealthSystem<br>Evanston, Illinois        |
| Jacek Skarbinski              | Kaiser Permanente Oakland Medical Center<br>Oakland, California |
| Kathryn Springer              | Centura Health Research Center<br>Devner, Colorado              |
| Chad Thury                    | Avera Research Institute<br>Sioux Falls, South Dakota           |
| Bruce Torkan                  | LA Universal Research Center, Inc.<br>Los Angeles, California   |
| Carlos Vaca                   | Nuren Medical and Research Center<br>Miami, Florida             |
| Brandon Webb                  | Intermountain Healthcare<br>Murray, Utah                        |

## **GS-US-540-9012 Research and Support Team Members**

The study authors and Gilead Sciences express our enormous gratitude to the staff at each hospital who risked their lives to care for patients with Covid-19. This study would not have been possible without their heroic efforts. We regret that we are unable to list the support staff at every hospital which took part in this study.

### **DENMARK**

#### **Copenhagen University Hospital - Rigshospitalet, Copenhagen, Denmark**

Jonathan Atilla Koefoed Starling, Bibi Uhre Nielsen, Anne Arentoft Bayer, Christian Leo Hansen, Jan Gerstoft, Dorthe Hass, Lene Pors Jensen,

### **SPAIN**

#### **Hospital Universitari Germans Trias i Pujol, Barcelona, Spain & irsiCaixa AIDS Research Institute**

Lourdes Mateu, MD, PhD; Constanza Lucero, MD, PhD; Anna Masferrer, MD; Maria Jose Dominguez, MD; Pere Toran, MD, PhD; Noemí Lamonja, MD; Silvia Roure, MD, PhD; Laura Soldevila, MD; Adrian Siles, MD; David Figueroa, BSc; Anna Chamorro, BSc; Anna Martinez, BSc; Jordi Puig, BSc.

#### **Hospital Universitario Infanta Leonor, Barcelona, Spain**

Belen Escribano, Pablo Ryan Murua, Jose Luise Fraile Gonzalez, Maria Gonzalez del Pozuelo, Ismael Escobar, Victorino Diez Viñas, Juan Ignacio Lazo Alvarez, Jorge Antonio Valencia La Rosa, Elsa Izquierdo Garcia

### **UNITED KINGDOM**

#### **University College London Hospitals, London, United Kingdom**

Ellie-Mae Young, Gabriella Bidwell, Diana Mabayoje, Tim Cutfileld, Mohammed Sakib Rokadiya, Naina McCann, Hugh Kingston, Deirdre Sally, Nina Bason, Sarah Logan, Novin Zahedi Fard, Richard Gilson, Chi Yee Chung, Pushpsen Joshi, Eyoanwan Simon-Modebe, Nicola Stewart, Odunola Akinyemi, Ewa Zatyka, Holly Baker, Anastasiya Deda, Pooja Patel, Robin Bailey, Zsofia Papp, Nayema Akther Tahmin, Michael Brown, Temi Olusi, Aileen Ni Chaoilte, Alessandro Borca, Abraham Roodt, Tracy-Lee Beukman, Marzia Fiorino, Gabriella Bidwell, Diana Mabayoje, Tim Cutfield, Mohammed Sakib Rokadiya, Deirdre Sally, Sarah Logan, Richard Gilson, Nicola Stewart, Ewa Zatyka, Robin Bailey, Aileen Ni Chaoilte, Alessandro Borca, Marzia Fiorino; James Burns, Veronica Barrett, Diana Phillips, Sneha Balhekar, Chi Yee Chung, Nina Bason, Zsofia Papp, Temi Olusi, Novin Zahedi Fard, Odunola Akinyemi, Abraham Roodt, Tracy-Lee Beukman

### **UNITED STATES**

#### **Arizona Liver Health, Mesa, Arizona**

Yessica Sachdeva, Kushal Doshi, Dina Gibson, Clarissa Zigelstein, Juanita Lingle, Sandy Billingsley, Anita Spring, Anita Kohli, Marissa Kopp, Carey Goldsmith, Kara Piper, Veronica Garcia, Jennifer Jones, Mario D'Gyves, , Jessica Bradley, Rajinder Kaur, Amanda McFarland, Deborah Gil Del Real, Sindy Gutierrez, Alisha Goyal, Dana Robledo, Kyle Bondy, Mary Goode, Kamilla Ojeda

**Baylor University Medical Center, Dallas, Texas**

Robert L Gottlieb MD PhD, John S. Garrett MD, Marcus Holmes DO, Mark Hupert MD, Cedric W. Spak MD, Samantha Adler, Eva Patel, Mostapha Balon RN, Amanda Doss, Rania El Tomi, Julianne Garnett, Shelby Shull RN, Sondra Skelly RN, Charity Smith, Adrian Palacios PharmD, Aaron Killian PharmD, Edilia Solis CPhT, Aayla Jamil, Joost Feliuss, Janet Jerrow, Leslie Jacob, Amy Barnette

**Baylor Scott & White Medical Center – Hillcrest, Waco, Texas**

Allison Crawford DO, Ronald Wilson, MD, Robert L Gottlieb MD PhD, Nancy Canada LVN, Maria Gorschboth, Amy Powers, Whitney “Taylor” Roznos, Pamela Zook LVN, Michele Richardson, Natalie Settele, Jessica Christian PharmD, Dianna Robinson LVN

**Baylor Scott & White Medical Center – Irving, Irving, Texas**

Steven G. Davis MD, Robert L. Gottlieb, MD PhD, Tania Purkayastha MD, Brittany Garcia, Jon Thammavong, Alyssa Boudreau, Johna Gilbert RN, Susan Ferdosian PharmD, Hemangini Joshi PharmD, Chad Samuelson PharmD, Keri Simon PharmD, Amy C. Thomas PharmD, Tammy Fisher

**Care United Research, LLC, Forney, Texas**

Shilpi Mittal, Patricia Church, Valerie Apodaca, Natalie Perini, Bilal Khan, Erin Clayton, Richard Slaughter, Nichole Alegria, Megan Followwell, Dimple Varughese, Sara Lembke, Anjelica Martinez, Katharine Daniel, Jennifer Jasso, Paula Smith

**Cherokee Nation, Talequah, Oklahoma**

Jorge Mera, Whitney Essex, Dwayne David, Stacey Thornton, Linzi Allen, Alena Korbut Clayton Myers, Kristen Adams, Emma Harp, Kristina Ramsey, Sabrina Brown, Elizabeth Odell, Ami Sams, Stephanie Hammons, Rebecca Albarran, Robin Rishinghawk, Kristin Walker, Stephanie Wisdom, and Carrie Garces.

**Evolution Clinical Research (Hialeah Gardens), Hialeah Gardens, Florida**

Gilberto Perez, Romel Figueredo, Michael Rones, Laura Fumero, Gianeya Mateu

**Fred Hutchinson Cancer Research Center, Seattle, Washington**

Joshua Hill, Rachel Blazevic, Jennifer Wright, Melissa Louthain, Jeffrey Gregory, Fatima Ranjbaran, Lauren Watson

**Intermountain Healthcare, Murray, Utah**

Brandon Webb, Sarah Kator, Anthony Putich, Erin Stahl, Alisa Thomas, Albert Kemp, Shannon Sell, Carlos Barbagelata, Jake Krong, David Tomer, Jenny Simmonds, Mark Crosby, Kaylene Russell, Elisa Montgomery

**Kaiser Permanente Oakland Medical Center, Oakland, California**



Jacek Skarbinski, Tashia Orr, Bernadette Aragon, Svetlana Siniy, Jewel Perry, Korenna Sinn, Kennette Yoshimura, Swain Bretton, Olivia Anaya, Ryan Pavlovich, Regina Linetskaya, Renee Cunanan, Jenny Yip, Ann Rose Downing, Isabel Perez, Pablo Sarmiento, Jade Ramos-Poblete, Kevin Won, Victoria Khomits-Koval, Kelly Sullivan, Wendy Evangelista, Susan Miranda, Kathy Cabassa, Susan Campbell, Cheyenne Lang, Sarah McLachlen, Hallie Seegal, Zara Fatima, Marina Rumore, Arin Urban, Somalee Banerjee, Brittany Ashlock, Monica Taylor, Alan Go, Linh Nguyen, Phenius Lathon, Angelique Tjen-A-Looi, Asaf Shor, Sriharsha Rao, Niti Mann, Lisa Liu, Sannaporn Sereenvinyayut, Jon Oide, Dana Sax, Dustin Mark, Jason Flamm, Charles Hare, Jonathon Volk, Paul Waldron, Meena Pai, Kevin Ernsting, Mayura Suryanarayan, Ingrid Stram-Doll, Gurpreet Rihal, Saroja Sripathi, Connie Park, Susan Jacobson, Rachna Bali, Mamata Kene, Calvin Kong, Matthew Eldridge, Andrew McNeil, Rodger Siemens, Dana Clutter, Jamila Champsi, George Minowada, Babak Kharazzi, Leila Ganjehei, Maziar Shirazi, Victoria Peckham, Shinh Sanal, Richard Joven, Bretton Swain, Maggie Turner, Victor Chen

**Luminous Clinical Research, Miami, Florida**

Ausberto Hidalgo, Jose Reinaldo Pinero, Lys Robles, Leighton Parkins, Carlos Batista

**Midland Florida Clinical Research Center LLC, Deland, Florida**

Godson Oguchi, Jack Dienes, Kahla Damianik, Shawn Massaro, Monique Mathis, Mauver Skipper, Jaime Norales, Mary Michelle Arsenault, Judepatrick Onyema, Ryan Thompson, Stacey-Ann Villaruel

**Nuren Medical and Research Center Miami, Florida**

Carlos Vaca, Milagros Nava, Ivan Canas, Patricia Flores, Yudemis Lau Barredo, Ivan Banguela, Humberto Hernandez

**Triple O Research Institute PA, West Palm Beach, Florida**

Olayemi Osiyemi, Alexandra Vargas, Ayana Campos, Paulesha Isaacs, Stephanie Sirof, Myriam Izquierdo, Nadine Davis, Christina Campbell, Jose Menajovsky-Chaves, Stephanie Martinez, Odelsy Torna, Michelle McDow, Praewpailin Rich

**University of Colorado – PPDS, Aurora, Colorado**

Adit Ginde

**Figure S1. Patient Disposition**

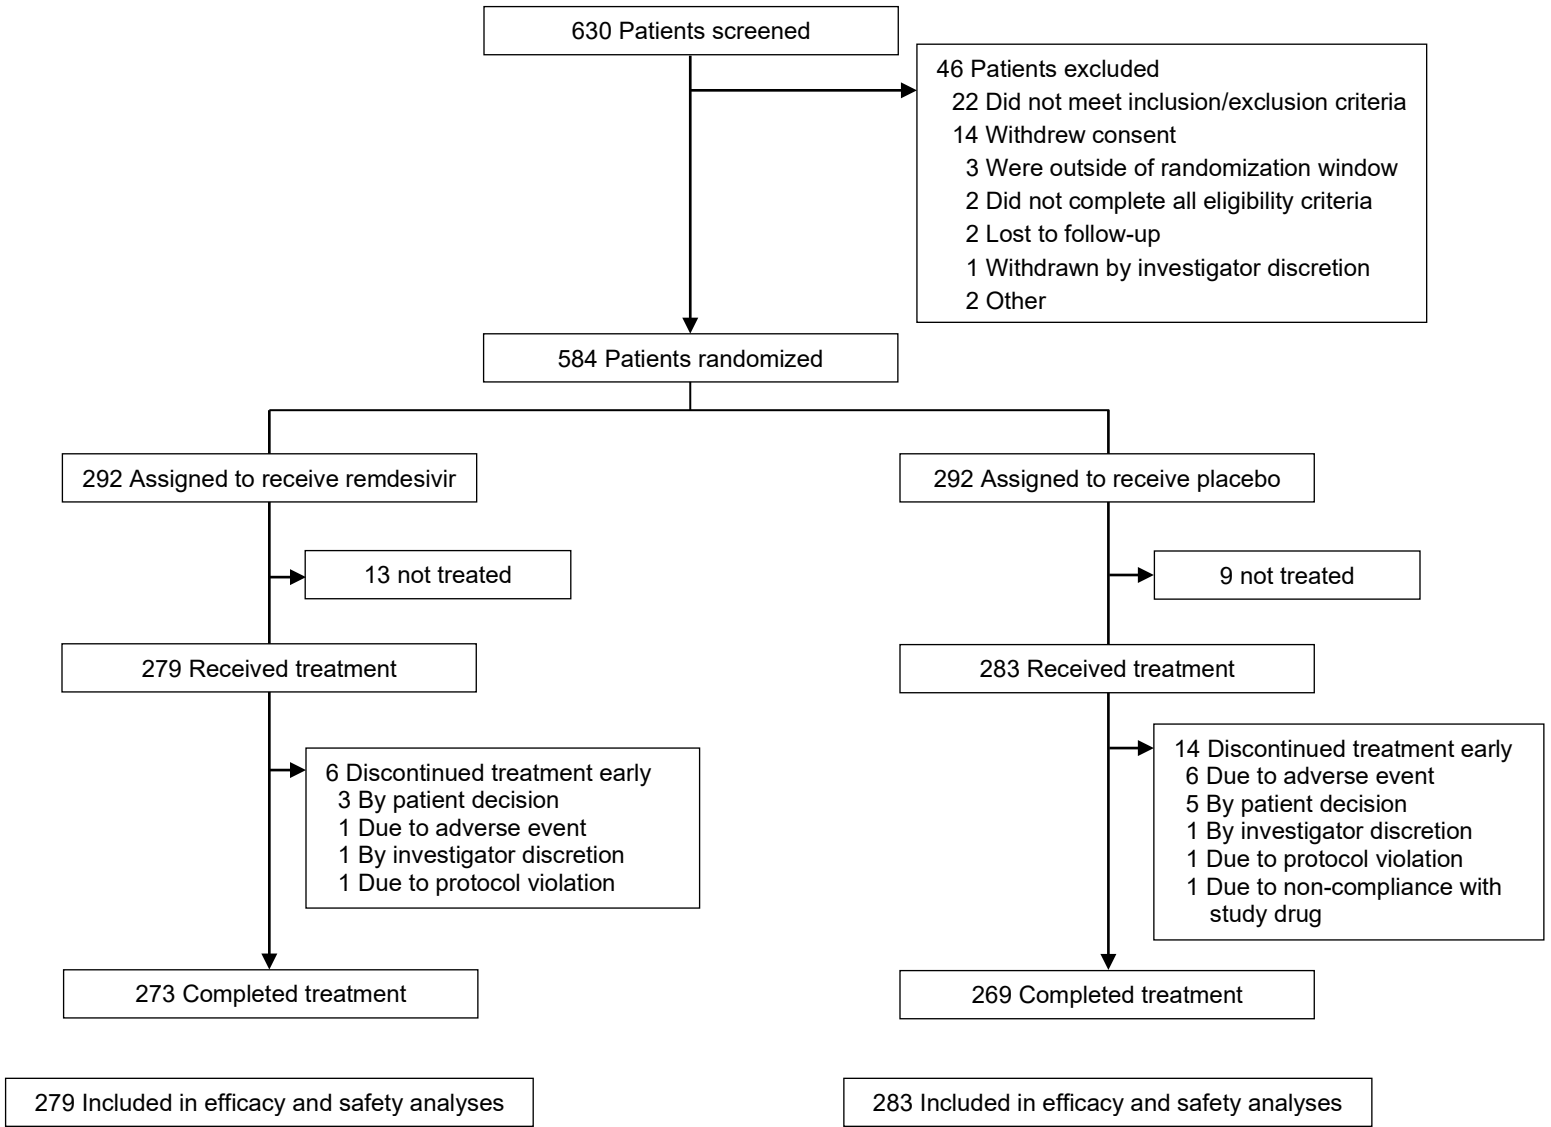

**Figure S2. Kaplan-Meier Estimate of Time to Symptom Alleviation as Reported by Covid-19-adapted FLU-PRO Questionnaire**

**A. Per protocol analysis, including patients who completed the baseline questionnaire before the first treatment dose**

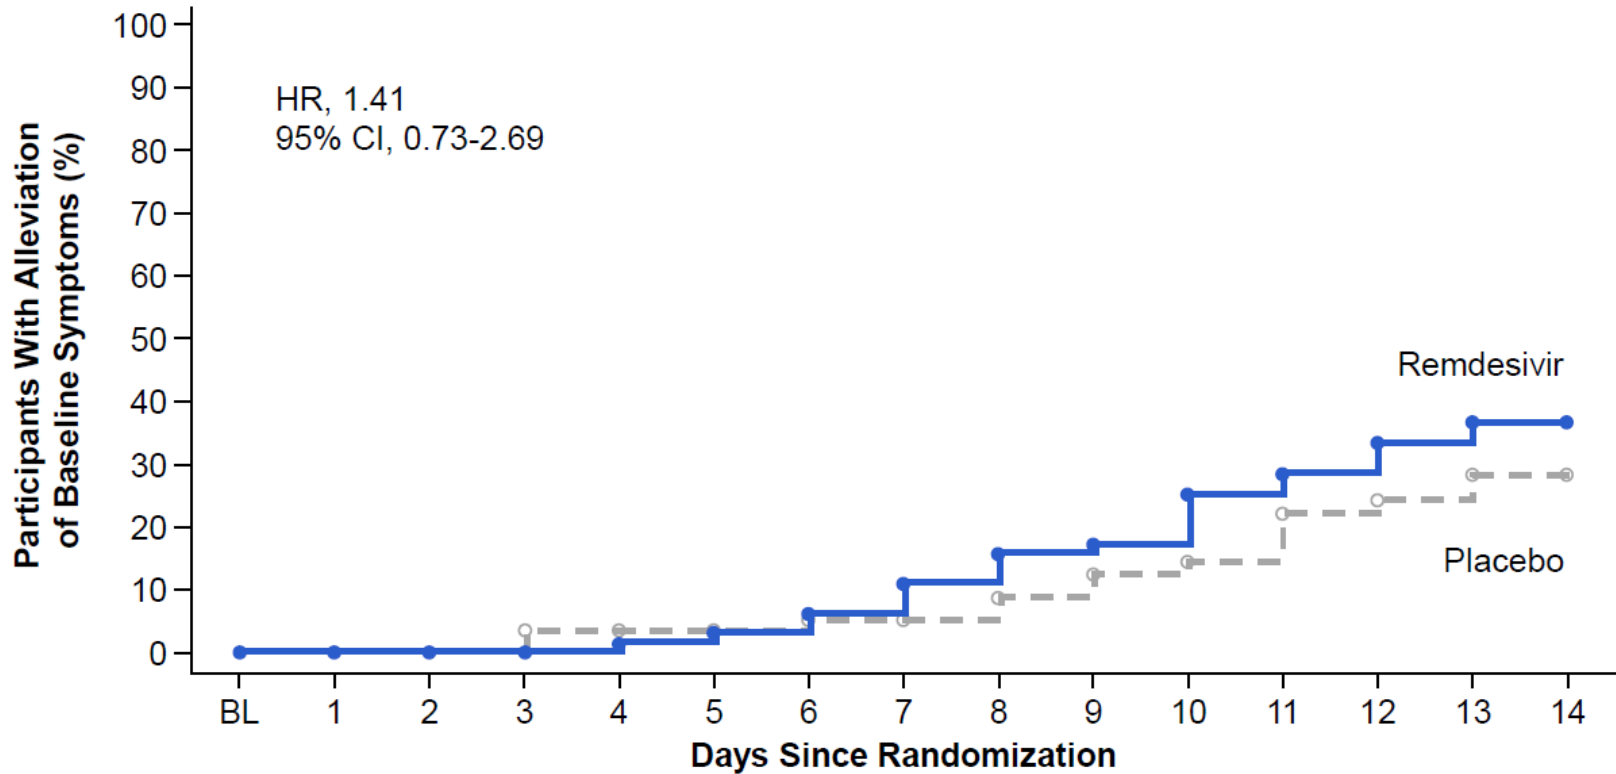

| No. at risk              | BL | 1  | 2  | 3  | 4  | 5  | 6  | 7  | 8  | 9  | 10 | 11 | 12 | 13 | 14 |
|--------------------------|----|----|----|----|----|----|----|----|----|----|----|----|----|----|----|
| Remdesivir IV for 3 days | 66 | 66 | 66 | 66 | 64 | 63 | 62 | 60 | 57 | 53 | 52 | 46 | 44 | 41 | 36 |
| Placebo                  | 60 | 60 | 60 | 59 | 57 | 57 | 56 | 55 | 52 | 49 | 47 | 44 | 38 | 37 | 32 |

Hazard Ratio and two-sided 95% CI were estimated using the Cox regression with baseline stratification factors (residence in a skilled nursing facility yes vs no, age <60 vs ≥60 years, and US vs outside US) as covariates. N represents the number of participants at risk at the beginning of the interval. BL, baseline; HR, hazard ratio.

**B. Post-hoc analysis, including patients who completed the baseline questionnaire prior to or on the same day as the first treatment dose**

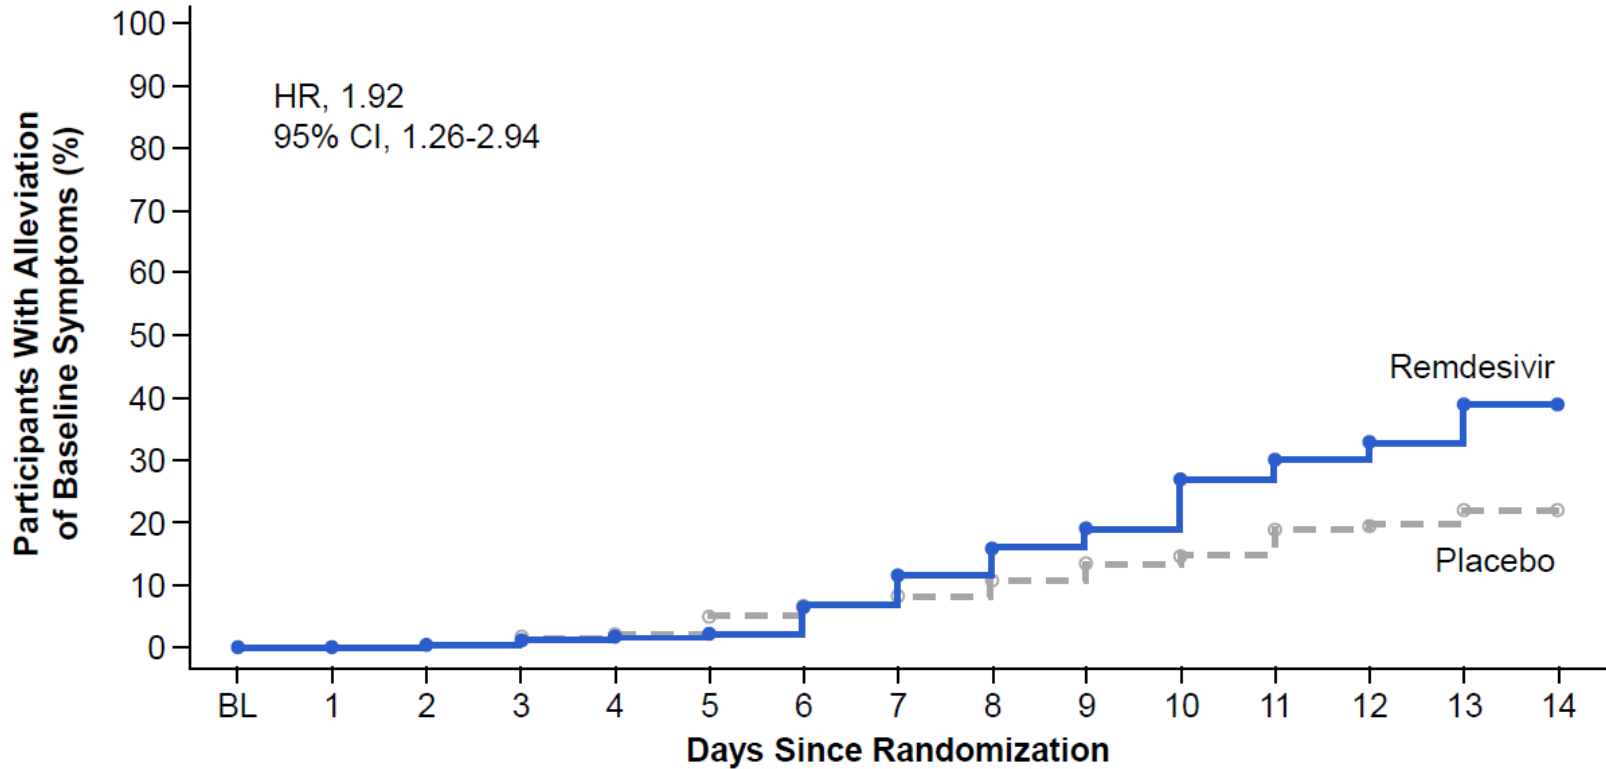

**No. at risk**

|                          |     |     |     |     |     |     |     |     |     |     |     |     |     |     |    |
|--------------------------|-----|-----|-----|-----|-----|-----|-----|-----|-----|-----|-----|-----|-----|-----|----|
| Remdesivir IV for 3 days | 169 | 169 | 169 | 167 | 162 | 161 | 159 | 152 | 141 | 133 | 125 | 112 | 106 | 99  | 80 |
| Placebo                  | 165 | 165 | 165 | 162 | 156 | 154 | 149 | 145 | 138 | 132 | 127 | 123 | 112 | 109 | 93 |

Participants who had baseline symptoms scored as 1 or higher and did not have alleviation were censored at the last assessment day. Hazard ratio and two-sided 95% CI were estimated using the Cox regression with baseline stratification factors (residence in a skilled nursing facility yes vs no, age <60 vs ≥60 years, and US vs outside US) as covariates. N represents the number of participants at risk at the beginning of the interval. BL, baseline; HR, hazard ratio.

Figure S3. Mean (95% CI) Change from Baseline in Nasopharyngeal SARS-CoV-2 Viral Load by Visit Day.

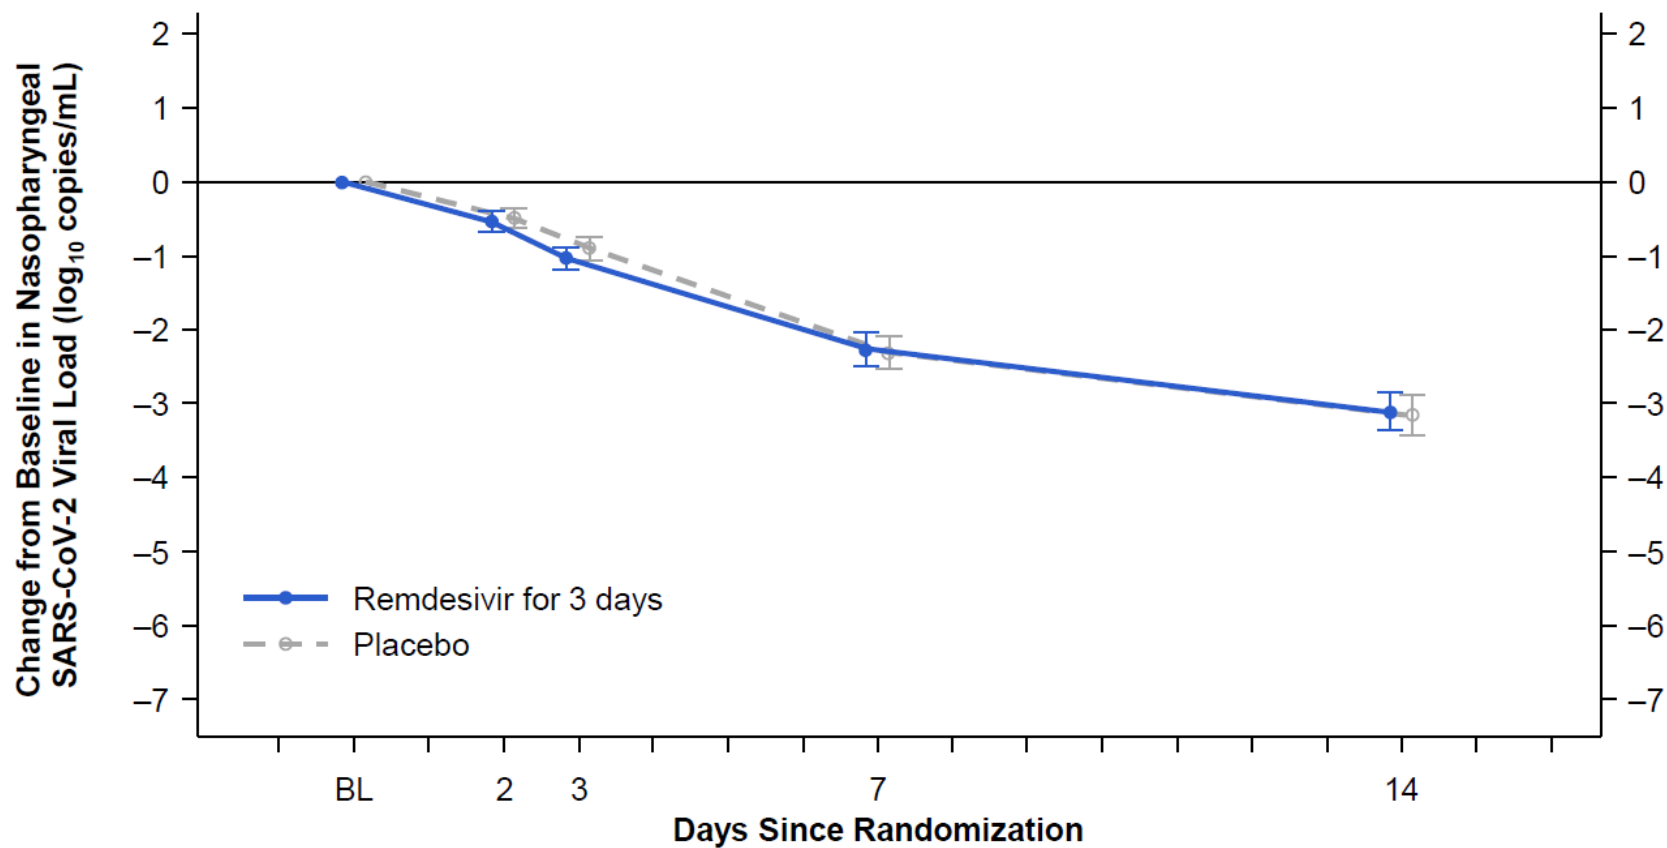

|                          |     |     |     |     |     |
|--------------------------|-----|-----|-----|-----|-----|
| Remdesivir IV for 3 days | 215 | 195 | 195 | 192 | 184 |
| Placebo                  | 213 | 192 | 187 | 190 | 169 |

**Table S1. Patient demographics, hospitalization data, and outcomes over the course of available follow-up**

| Patient                 | Treatment  | Age | Sex | Day of hospitalization (from time of randomization) | Reason for hospitalization                      | Covid-19 related Yes/no | ICU Yes/no | Outcome (transfer/discharged/death) |
|-------------------------|------------|-----|-----|-----------------------------------------------------|-------------------------------------------------|-------------------------|------------|-------------------------------------|
| <b>Remdesivir group</b> |            |     |     |                                                     |                                                 |                         |            |                                     |
| 1                       | Remdesivir | 81  | F   | 3                                                   | Respiratory failure                             | Yes                     | Unknown    | Discharged                          |
| 2                       | Remdesivir | 40  | M   | 2                                                   | Pneumonia                                       | Yes                     | Yes        | Discharged                          |
| 3                       | Remdesivir | 60  | F   | 8                                                   | Atrial fibrillation                             | No                      | Yes        | Discharged                          |
| 4                       | Remdesivir | 71  | M   | 7                                                   | Cardiac failure congestive, Atrial fibrillation | No                      | Yes        | Discharged                          |
| 5                       | Remdesivir | 49  | M   | 4                                                   | Angina pectoris                                 | No                      | No         | Discharged                          |
| <b>Placebo group</b>    |            |     |     |                                                     |                                                 |                         |            |                                     |
| 6                       | Placebo    | 53  | F   | 2                                                   | Covid-19 pneumonia                              | Yes                     | Yes        | Discharged                          |
| 7                       | Placebo    | 62  | F   | 3                                                   | Pneumonia                                       | Yes                     | No         | Discharged                          |
| 8                       | Placebo    | 71  | M   | 9                                                   | Covid-19 pneumonia                              | Yes                     | Yes        | Discharged                          |
| 9                       | Placebo    | 50  | M   | 3                                                   | Hypoxia                                         | Yes                     | No         | Discharged                          |
| 10                      | Placebo    | 68  | M   | 14                                                  | Pneumonia                                       | Yes                     | No         | Discharged                          |
| 11                      | Placebo    | 66  | M   | 7                                                   | Fibrin D-dimer increased                        | Yes                     | No         | Discharged                          |
| 12                      | Placebo    | 68  | M   | 2                                                   | Acute respiratory failure, Covid-19 pneumonia   | Yes                     | No         | Discharged                          |
| 13                      | Placebo    | 57  | M   | 7                                                   | Covid-19 pneumonia                              | Yes                     | No         | Discharged                          |
| 14                      | Placebo    | 63  | F   | 7                                                   | Covid-19 pneumonia                              | Yes                     | No         | Discharged                          |
| 15                      | Placebo    | 69  | M   | 7                                                   | Covid-19                                        | Yes                     | Yes        | Death at study day 59               |

|    |         |    |   |    |                                                  |     |         |             |
|----|---------|----|---|----|--------------------------------------------------|-----|---------|-------------|
| 16 | Placebo | 74 | F | 2  | Covid-19 pneumonia                               | Yes | No      | Transferred |
| 17 | Placebo | 60 | F | 1  | Dyspnea                                          | Yes | No      | Discharged  |
| 18 | Placebo | 54 | M | 2  | Covid-19                                         | Yes | No      | Discharged  |
| 19 | Placebo | 55 | M | 6  | Covid-19 pneumonia, Respiratory failure          | Yes | No      | Discharged  |
| 20 | Placebo | 56 | F | 3  | Hypoxia, Pneumonia                               | Yes | No      | Discharged  |
| 21 | Placebo | 63 | F | 21 | Lumbar vertebral fracture, road traffic accident | No  | No      | Discharged  |
| 22 | Placebo | 56 | M | 26 | Angina pectoris                                  | No  | Unknown | Discharged  |
| 23 | Placebo | 48 | F | 19 | Acute myocardial infarction                      | No  | No      | Discharged  |

Shaded rows indicate non-Covid-19-related hospitalizations.

**Table S2. Representativeness of Study Participants**

|                                                           |                                                                                                                                                                                                                                                                                                                                                                                                                                                                                                                                                                                                                                                                                                                                                                                                                                                                                                                                                                                                                                                                                                                                                                                         |
|-----------------------------------------------------------|-----------------------------------------------------------------------------------------------------------------------------------------------------------------------------------------------------------------------------------------------------------------------------------------------------------------------------------------------------------------------------------------------------------------------------------------------------------------------------------------------------------------------------------------------------------------------------------------------------------------------------------------------------------------------------------------------------------------------------------------------------------------------------------------------------------------------------------------------------------------------------------------------------------------------------------------------------------------------------------------------------------------------------------------------------------------------------------------------------------------------------------------------------------------------------------------|
| <b>Category</b>                                           |                                                                                                                                                                                                                                                                                                                                                                                                                                                                                                                                                                                                                                                                                                                                                                                                                                                                                                                                                                                                                                                                                                                                                                                         |
| <b>Disease, problem, or condition under investigation</b> | Covid-19 in high-risk, non-hospitalized patients.                                                                                                                                                                                                                                                                                                                                                                                                                                                                                                                                                                                                                                                                                                                                                                                                                                                                                                                                                                                                                                                                                                                                       |
| <b>Special considerations related to:</b>                 |                                                                                                                                                                                                                                                                                                                                                                                                                                                                                                                                                                                                                                                                                                                                                                                                                                                                                                                                                                                                                                                                                                                                                                                         |
| <b>Sex and gender</b>                                     | Male patients have a significantly higher risk of Covid-19 disease progression. <sup>1</sup>                                                                                                                                                                                                                                                                                                                                                                                                                                                                                                                                                                                                                                                                                                                                                                                                                                                                                                                                                                                                                                                                                            |
| <b>Age</b>                                                | Older adults aged 60 years or greater are at higher risk of severe illness due to Covid-19. <sup>2,3</sup>                                                                                                                                                                                                                                                                                                                                                                                                                                                                                                                                                                                                                                                                                                                                                                                                                                                                                                                                                                                                                                                                              |
| <b>Race or ethnic group</b>                               | <p>Covid-19 does not generally impact racial or ethnic groups differently, but due to systemic health and social inequities, some racial and ethnic minorities, such as Hispanic/Latinx and Black persons in the United States, are at increased risk for Covid-19.<sup>2</sup></p> <p>This trial is noteworthy for high enrollment among Hispanic/Latinx and American Indian/Alaskan Native population relative to the general population of the US.</p>                                                                                                                                                                                                                                                                                                                                                                                                                                                                                                                                                                                                                                                                                                                               |
| <b>Geography</b>                                          | Covid-19 is a global pandemic.                                                                                                                                                                                                                                                                                                                                                                                                                                                                                                                                                                                                                                                                                                                                                                                                                                                                                                                                                                                                                                                                                                                                                          |
| <b>Other considerations</b>                               | The risk of severe Covid-19 increases as the number of underlying medical conditions increases in a person. <sup>3</sup>                                                                                                                                                                                                                                                                                                                                                                                                                                                                                                                                                                                                                                                                                                                                                                                                                                                                                                                                                                                                                                                                |
| <b>Overall representativeness of this trial</b>           | <p>The patient population enrolled was balanced between male and female sex. About one third (30%) of patients were over the age of 60. No patients under the age of 12 were enrolled. Relative to the general United States population, of 562 patients, a higher proportion of patients with Hispanic/Latinx ethnicity (235, 44%) and American Indian or Alaskan Native race were enrolled (36, 7%), and a lower proportion of Black (42, 8%) or Asian race (13, 2%) were enrolled. Most patients enrolled (94%) were from the United States. Patients with severe renal disease and patients who were not vaccinated were excluded from enrollment. A lower proportion of patients who were immunocompromised (23, 5%) and patients with active cancer (30, 4%) were enrolled. Although the pediatric population does not generally contain high-risk patients, and vaccinated individuals have low rates of hospitalization, the lack of these patients in the study population precludes generalizability to these groups. All patient characteristics described here were self-reported by patients and collected at screening and were entered into the electronic database.</p> |



## REFERENCES

1. Peckham H, de Gruijter NM, Raine C, et al. Male sex identified by global COVID-19 meta-analysis as a risk factor for death and ICU admission. *Nat Commun* 2020;11:6317.
2. Risk for COVID-19 Infection, Hospitalization, and Death by Race/Ethnicity. Atlanta, GA: Centers for Disease Control and Prevention, September 2021. (<https://www.cdc.gov/coronavirus/2019-ncov/covid-data/investigations-discovery/hospitalization-death-by-race-ethnicity.html>).
3. Assessing Risk Factors for Severe COVID-19 Illness. Atlanta, GA; Centers for Disease Control and Prevention., November 2020. (<https://www.cdc.gov/coronavirus/2019-ncov/covid-data/investigations-discovery/assessing-risk-factors.html>).
