# Supplementary material
Source: PubMed Central journal article supplement (PMC8757570)
Supplement: NEJMoa2116846_data-sharing.pdf [file NEJMoa2116846_data-sharing.pdf]

## Data Sharing Statement

Gottlieb RL, Vaca CE, Paredes R, et al. Early Remdesivir to Prevent Progression to Severe Covid-19 in Outpatients. N Engl J Med. DOI: 10.1056/NEJMoa2116846.

| Question                                                            | Authors' Response                                                                                                                                                                                                                        |
|---------------------------------------------------------------------|------------------------------------------------------------------------------------------------------------------------------------------------------------------------------------------------------------------------------------------|
| Will the data collected for your study be made available to others? | Yes                                                                                                                                                                                                                                      |
| Would you like to offer context for your decision?                  | —                                                                                                                                                                                                                                        |
| Which data?                                                         | Complete de-identified patient data set                                                                                                                                                                                                  |
| Additional information about data                                   | —                                                                                                                                                                                                                                        |
| How or where can the data be obtained?                              | datarequest@gilead.com                                                                                                                                                                                                                   |
| When will data availability begin?                                  | Six months after FDA and EMA approval of the compound studied.                                                                                                                                                                           |
| When will data availability end?                                    | N/A                                                                                                                                                                                                                                      |
| Will any supporting documents be available?                         | —                                                                                                                                                                                                                                        |
| Which supporting documents?                                         | Other                                                                                                                                                                                                                                    |
| Additional information about supporting documents                   | Clinical study report synopsis                                                                                                                                                                                                           |
| How or where can supporting documents be obtained?                  | datarequest@gilead.com                                                                                                                                                                                                                   |
| When will supporting documents availability begin?                  | Six months after FDA and EMA approval of the compound studied.                                                                                                                                                                           |
| When will supporting documents availability end?                    | N/A                                                                                                                                                                                                                                      |
| To whom will data be available?                                     | Qualified external researchers                                                                                                                                                                                                           |
| For what type of analysis or purpose?                               | Requests are at Gilead's discretion and dependent on the nature of the request, the merit of the research proposed, availability of the data and the intended use of the data.                                                           |
| By what mechanism?                                                  | If Gilead agrees to the release of clinical data for research purposes, the requestor will be required to sign a data sharing agreement (DSA) in order to ensure protection of patient confidentiality prior to the release of any data. |
| Any other restrictions?                                             | Upon execution of the DSA, Gilead will provide access to a patient-level clinical trial analysis datasets in a secured analysis environment.                                                                                             |
| Additional information                                              | —                                                                                                                                                                                                                                        |

This statement was posted on December 22, 2021, at NEJM.org.
