# Supplementary material
Source: PubMed Central journal article supplement (PMC8757570)
Supplement: NEJMoa2116846_disclosures.pdf [file NEJMoa2116846_disclosures.pdf]

**Disclosure Purpose:** 21-16846

## Summary of Interests

| Company or Organization                                                                                        |            |                              |
|----------------------------------------------------------------------------------------------------------------|------------|------------------------------|
| Entity                                                                                                         | Type       | Interest Held By             |
| <a href="#">Gilead Sciences, Inc.</a>                                                                          | Employment | Self                         |
| <i>Title:</i> Director, Clinical Research - Emerging and Respiratory Viruses<br><i>Additional Information:</i> |            | <i>Position Description:</i> |

## Additional Questions:

- Are there other relationships or activities that readers could perceive to have influenced, or that give the appearance of potentially influencing, what you wrote in the submitted work?**  
No.
- What is the manuscript title?**  
Early Outpatient Remdesivir to Prevent Progression to Severe Covid-19
- Are you the corresponding author?**  
No.

## Certification

I certify that the information provided in this disclosure is complete and accurate.

**Disclosure Purpose:** 21-16846

### Summary of Interests

I do not have any interests to disclose at this time.

### Additional Questions:

- Are there other relationships or activities that readers could perceive to have influenced, or that give the appearance of potentially influencing, what you wrote in the submitted work?**  
No.
- What is the manuscript title?**  
Early Outpatient Remdesivir to Prevent Progression to Severe Covid-19
- Are you the corresponding author?**  
No.

### Certification

I certify that the information provided in this disclosure is complete and accurate.

**Disclosure Purpose:** 21-16846

## Summary of Interests

| Company or Organization                                  |       |                                                                                               |
|----------------------------------------------------------|-------|-----------------------------------------------------------------------------------------------|
| Entity                                                   | Type  | Interest Held By                                                                              |
| Gilead Sciences                                          | Other | Other - My host institution received financial recompense for local delivery of these trials. |
| <i>Category:</i> Other<br><i>Additional Information:</i> |       | <i>Description:</i> Local PI (and for this trial, UK CI) for remdesivir clinical trials       |

## Additional Questions:

- Are there other relationships or activities that readers could perceive to have influenced, or that give the appearance of potentially influencing, what you wrote in the submitted work?**  
No.
- What is the manuscript title?**  
Remdesivir for early treatment of COVID in ambulatory patients
- Are you the corresponding author?**  
No.

## Certification

I certify that the information provided in this disclosure is complete and accurate.

Disclosure Purpose: 21-16846

Summary of Interests

**Company or Organization**

| Entity                                                                                                                                                                                                                           | Type                       | Interest Held By                                                                                                          |
|----------------------------------------------------------------------------------------------------------------------------------------------------------------------------------------------------------------------------------|----------------------------|---------------------------------------------------------------------------------------------------------------------------|
| <b>Centers for Disease Control and Prevention</b><br><i>Recipient Name:</i> Samuel Brown<br><i>Grant / Contract Description:</i> IVY Network studying COVID vaccine efficacy<br><i>Additional Information:</i>                   | Grant / Contract           | Self<br><i>Recipient Type:</i> Institution<br><i>Grant / Contract Purpose:</i> Research                                   |
| <b>Hamilton Health Sciences</b><br><i>Category:</i> Data And Safety Monitoring<br><i>Additional Information:</i>                                                                                                                 | Data And Safety Monitoring | Self<br><i>Description:</i> DSMB Chair for a mechanical ventilator trial                                                  |
| <b>National Institutes of Health</b><br><i>Recipient Name:</i> Samuel Brown<br><i>Grant / Contract Description:</i> Investigator effort for COVID-19 trials.<br><i>Additional Information:</i>                                   | Grant / Contract           | Self<br><i>Recipient Type:</i> Institution<br><i>Grant / Contract Purpose:</i> Research                                   |
| <b>National Institutes of Health</b><br><i>Recipient Name:</i> Samuel Brown<br><i>Grant / Contract Description:</i> Service on CONNECTS steering committee for NHLBI.<br><i>Additional Information:</i>                          | Grant / Contract           | Self<br><i>Recipient Type:</i> Individual<br><i>Grant / Contract Purpose:</i> Research                                    |
| <b>Sedana</b><br><i>Category:</i> Consultant<br><i>Additional Information:</i> Support was paid to my employer, not to me.                                                                                                       | Consultant                 | Self<br><i>Description:</i> Consulted on trial design for a sedation trial                                                |
| <b>U.S. Department of Defense</b><br><i>Recipient Name:</i> Samuel Brown<br><i>Grant / Contract Description:</i> Grant to study long-term outcomes after COVID associated respiratory failure.<br><i>Additional Information:</i> | Grant / Contract           | Self<br><i>Recipient Type:</i> Institution<br><i>Grant / Contract Purpose:</i> Research<br><i>Additional Information:</i> |

Additional Questions:

- Are there other relationships or activities that readers could perceive to have influenced, or that give the appearance of potentially influencing, what you wrote in the submitted work?**  
No.
- What is the manuscript title?**  
Early Outpatient Remdesivir to Prevent Progression to Severe Covid-19
- Are you the corresponding author?**  
No.

Certification

I certify that the information provided in this disclosure is complete and accurate.

**Disclosure Purpose:** 21-16846

## Summary of Interests

| Company or Organization                                                      |            |                                                             |
|------------------------------------------------------------------------------|------------|-------------------------------------------------------------|
| Entity                                                                       | Type       | Interest Held By                                            |
| <a href="#">Gilead Sciences Inc</a>                                          | Employment | Self                                                        |
| <i>Title:</i> Senior Research Scientist II<br><i>Additional Information:</i> |            | <i>Position Description:</i> Scientist in clinical virology |
| <a href="#">Gilead Sciences Inc</a>                                          | Stock      | Self                                                        |
| <i>Additional Information:</i>                                               |            |                                                             |

## Additional Questions:

- Are there other relationships or activities that readers could perceive to have influenced, or that give the appearance of potentially influencing, what you wrote in the submitted work?**  
No.
- What is the manuscript title?**  
Early Outpatient Remdesivir to Prevent Progression to Severe Covid-19
- Are you the corresponding author?**  
No.

## Certification

I certify that the information provided in this disclosure is complete and accurate.

Disclosure Purpose: 21-16846

Summary of Interests

**Company or Organization**

| Entity                                                                 | Type       | Interest Held By                                         |
|------------------------------------------------------------------------|------------|----------------------------------------------------------|
| Gilead Sciences, Inc.                                                  | Employment | Self                                                     |
| <i>Title:</i> Director Biostatistics<br><i>Additional Information:</i> |            | <i>Position Description:</i> Biostatistics lead of study |
| Gilead Sciences, Inc.                                                  | Stock      | Self                                                     |
| <i>Additional Information:</i>                                         |            |                                                          |

Additional Questions:

- Are there other relationships or activities that readers could perceive to have influenced, or that give the appearance of potentially influencing, what you wrote in the submitted work?**  
No.
- What is the manuscript title?**  
Early Outpatient Remdesivir to Prevent Progression to Severe Covid-19
- Are you the corresponding author?**  
No.

Certification

I certify that the information provided in this disclosure is complete and accurate.

**Disclosure Purpose:** 21-16846

**Summary of Interests**

I do not have any interests to disclose at this time.

**Additional Questions:**

- 1. **Are there other relationships or activities that readers could perceive to have influenced, or that give the appearance of potentially influencing, what you wrote in the submitted work?**  
No.
- 2. **What is the manuscript title?**  
Early Outpatient Remdesivir to Prevent Progression to Severe Covid-19
- 3. **Are you the corresponding author?**  
No.

**Certification**

I certify that the information provided in this disclosure is complete and accurate.

Disclosure Purpose: 21-16846

Summary of Interests

**Company or Organization**

| Entity                                                                                                                  | Type       | Interest Held By                                                                       |
|-------------------------------------------------------------------------------------------------------------------------|------------|----------------------------------------------------------------------------------------|
| Gilead Sciences Inc                                                                                                     | Employment | Self                                                                                   |
| <i>Title:</i> Senior Vice President, Clinical Research                                                                  |            | <i>Position Description:</i> Virology Therapeutic Area Clinical Development Leadership |
| <i>Additional Information:</i> Also a consultant to the Remdesivir Clinical Research Team from April, 2020 - July, 2021 |            |                                                                                        |

Additional Questions:

- Are there other relationships or activities that readers could perceive to have influenced, or that give the appearance of potentially influencing, what you wrote in the submitted work?**  
No.
- What is the manuscript title?**  
Early Outpatient Remdesivir to Prevent Progression to Severe Covid-19
- Are you the corresponding author?**  
No.

Certification

I certify that the information provided in this disclosure is complete and accurate.

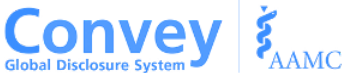



Disclosure Purpose: 21-16846

Summary of Interests

| Company or Organization                                                                                                                                                   |                  |                                                                                                                   |
|---------------------------------------------------------------------------------------------------------------------------------------------------------------------------|------------------|-------------------------------------------------------------------------------------------------------------------|
| Entity                                                                                                                                                                    | Type             | Interest Held By                                                                                                  |
| AbbVie                                                                                                                                                                    | Grant / Contract | Self                                                                                                              |
| <i>Recipient Name:</i> Adit Ginde<br><i>Grant / Contract Description:</i> Investigator initiated research grant for COVID-19 outpatient trial, outside the submitted work |                  | <i>Recipient Type:</i> Institution<br><i>Grant / Contract Purpose:</i> Research<br><i>Additional Information:</i> |
| Faron Pharmaceuticals                                                                                                                                                     | Grant / Contract | Self                                                                                                              |
| <i>Recipient Name:</i> Adit Ginde<br><i>Grant / Contract Description:</i> Investigator initiated research grant for COVID-19 inpatient trial, outside the submitted work  |                  | <i>Recipient Type:</i> Institution<br><i>Grant / Contract Purpose:</i> Research<br><i>Additional Information:</i> |

Additional Questions:

- Are there other relationships or activities that readers could perceive to have influenced, or that give the appearance of potentially influencing, what you wrote in the submitted work?  
No.
- What is the manuscript title?  
Early Outpatient Remdesivir to Prevent Progression to Severe Covid-19
- Are you the corresponding author?  
No.

Certification

I certify that the information provided in this disclosure is complete and accurate.

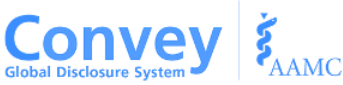

Disclosure Purpose: 21-16846

Summary of Interests

| Entity                                                                                                                                                                                                       | Type             | Interest Held By                                                                                        |
|--------------------------------------------------------------------------------------------------------------------------------------------------------------------------------------------------------------|------------------|---------------------------------------------------------------------------------------------------------|
| <a href="#">Eli Lilly and Company</a>                                                                                                                                                                        | Consultant       | Self                                                                                                    |
| <i>Category:</i> Consultant<br><i>Additional Information:</i>                                                                                                                                                |                  | <i>Description:</i> Scientific Advisory Board                                                           |
| <a href="#">F. Hoffmann-La Roche</a>                                                                                                                                                                         | Consultant       | Self                                                                                                    |
| <i>Category:</i> Consultant<br><i>Additional Information:</i>                                                                                                                                                |                  | <i>Description:</i> Scientific Advisory Board                                                           |
| <a href="#">Gilead Sciences, Inc.</a>                                                                                                                                                                        | Gift             | Other - Gift-in-kind to Baylor Scott & White Research Institute related to TROJAN-C trial (NCT03383419) |
| <i>Description:</i> Gift-in-Kind to Baylor Scott & White Research Institute related to TROJAN-C trial (NCT03383419)<br><i>Additional Information:</i>                                                        |                  |                                                                                                         |
| <a href="#">Gilead Sciences, Inc.</a>                                                                                                                                                                        | Grant / Contract | Other - Contract research fees to Baylor Scott & White Research Institute                               |
| <i>Recipient Name:</i> Baylor Scott and White Research Institute<br><i>Grant / Contract Description:</i> Contract research fees to Baylor Scott & White Research Institute<br><i>Additional Information:</i> |                  | <i>Recipient Type:</i> Institution<br><i>Grant / Contract Purpose:</i> Research                         |
| <a href="#">Gilead Sciences, Inc.</a>                                                                                                                                                                        | Consultant       | Self                                                                                                    |
| <i>Category:</i> Consultant<br><i>Additional Information:</i>                                                                                                                                                |                  | <i>Description:</i> Scientific Advisory Board                                                           |
| <a href="#">GlaxoSmithKline, LLC.</a>                                                                                                                                                                        | Consultant       | Self                                                                                                    |
| <i>Category:</i> Consultant<br><i>Additional Information:</i>                                                                                                                                                |                  | <i>Description:</i> Scientific Advisory Board                                                           |
| <a href="#">Janssen Research &amp; Development, LLC</a>                                                                                                                                                      | Consultant       | Self                                                                                                    |
| <i>Category:</i> Consultant<br><i>Additional Information:</i>                                                                                                                                                |                  | <i>Description:</i>                                                                                     |
| <a href="#">Kinevant Sciences</a>                                                                                                                                                                            | Consultant       | Other - Consulting fees to Baylor Scott & White Research Institute                                      |
| <i>Category:</i> Consultant<br><i>Additional Information:</i>                                                                                                                                                |                  | <i>Description:</i> Academic Steering Committee Member                                                  |

Additional Questions:

1. Are there other relationships or activities that readers could perceive to have influenced, or that give the appearance of potentially influencing, what you wrote in the submitted work?

No.

2. What is the manuscript title?

Early Outpatient Remdesivir to Prevent Progression to Severe Covid-19

3. Are you the corresponding author?

Yes.

a. Please list the other authors' names here.

Carlos E. Vaca MD, Roger Paredes, MD, Jorge Mera, MD, Brandon J. Webb, MD, Gilberto Perez, MD, Godson Oguchi, MD, Pablo Ryan, MD, PhD, Bibi Uhre Nielsen, MD, Michael Brown, PhD, FRCP, Ausberto Hidalgo, Yessica Sachdeva, MD, Shilpi Mittal, MD, Olayemi Osiyemi, MD, Jacek Skarbinski, MD, Kavita Juneja, MD, Robert H. Hyland, DPhil, Anu Osinusi, MD, Shuguang Chen, PhD, Gregory Camus, PhD, Mazin Abdelghany, MD, Santosh Davies, MD, Nicole Behenna-Renton, Frank Duff, MD, 18 Francisco M. Marty, MD, Morgan Katz, MD, Adit A. Ginde, MD, MPH, Samuel M. Brown, MD, MS, Joshua T. Schiffer, MD, and Joshua A. Hill, MD, for the GS-US-540-9012 (PINETREE) Investigators

Certification

I certify that the information provided in this disclosure is complete and accurate.

**Disclosure Purpose:** 21-16846

### Summary of Interests

I do not have any interests to disclose at this time.

### Additional Questions:

- Are there other relationships or activities that readers could perceive to have influenced, or that give the appearance of potentially influencing, what you wrote in the submitted work?**  
No.
- What is the manuscript title?**  
Early Outpatient Remdesivir to Prevent Progression to Severe Covid-19
- Are you the corresponding author?**  
No.

### Certification

I certify that the information provided in this disclosure is complete and accurate.

**Disclosure Purpose:** 21-16846

## Summary of Interests

| Entity                                                                                                                                                                                                      | Type             | Interest Held By                                                                                     |
|-------------------------------------------------------------------------------------------------------------------------------------------------------------------------------------------------------------|------------------|------------------------------------------------------------------------------------------------------|
| <a href="#">allovir</a>                                                                                                                                                                                     | Grant / Contract | Self                                                                                                 |
| <i>Recipient Name:</i> Joshua A Hill<br><i>Grant / Contract Description:</i> clinical trial site PI and other research studies<br><i>Additional Information:</i>                                            |                  | <i>Recipient Type:</i> Institution<br><i>Grant / Contract Purpose:</i> Research                      |
| <a href="#">allovir</a>                                                                                                                                                                                     | Consultant       | Self                                                                                                 |
| <i>Category:</i> Consultant<br><i>Additional Information:</i>                                                                                                                                               |                  | <i>Description:</i> expert on epidemiology of viral infections, assisting with clinical trial design |
| <a href="#">Deverra therapeutics</a>                                                                                                                                                                        | Grant / Contract | Self                                                                                                 |
| <i>Recipient Name:</i> Joshua A Hill<br><i>Grant / Contract Description:</i> PI of investigator-initiated trial using their study product to treat patients with COVID-19<br><i>Additional Information:</i> |                  | <i>Recipient Type:</i> Institution<br><i>Grant / Contract Purpose:</i> Research                      |
| <a href="#">Gilead Sciences Inc</a>                                                                                                                                                                         | Grant / Contract | Self                                                                                                 |
| <i>Recipient Name:</i> Joshua A Hill<br><i>Grant / Contract Description:</i> To conduct a clinical trial<br><i>Additional Information:</i>                                                                  |                  | <i>Recipient Type:</i> Institution<br><i>Grant / Contract Purpose:</i> Research                      |
| <a href="#">Gilead Sciences Inc</a>                                                                                                                                                                         | Consultant       | Self                                                                                                 |
| <i>Category:</i> Consultant<br><i>Additional Information:</i> 1 day                                                                                                                                         |                  | <i>Description:</i> Presented data on herpes viral infection epidemiology                            |
| <a href="#">Gilead Sciences Inc</a>                                                                                                                                                                         | Travel           | Self                                                                                                 |
| <i>Location(s):</i> foster city, california<br><i>Additional Information:</i>                                                                                                                               |                  | <i>Purpose:</i> to present data on herpesvirus epidemiology to the company                           |

## Additional Questions:

- Are there other relationships or activities that readers could perceive to have influenced, or that give the appearance of potentially influencing, what you wrote in the submitted work?**  
No.
- What is the manuscript title?**  
Early Outpatient Remdesivir to Prevent Progression to Severe Covid-19
- Are you the corresponding author?**  
No.

## Certification

I certify that the information provided in this disclosure is complete and accurate.

**Disclosure Purpose:** 21-16846

## Summary of Interests

| Company or Organization                                                               |              |                              |
|---------------------------------------------------------------------------------------|--------------|------------------------------|
| Entity                                                                                | Type         | Interest Held By             |
| Gilead Sciences, Inc.                                                                 | Employment   | Self                         |
| <i>Title:</i> Senior Director, Clinical Development<br><i>Additional Information:</i> |              | <i>Position Description:</i> |
| Gilead Sciences, Inc.                                                                 | Stock        | Self                         |
| <i>Additional Information:</i>                                                        |              |                              |
| Gilead Sciences, Inc.                                                                 | Stock Option | Self                         |
| <i>Additional Information:</i>                                                        |              |                              |

## Additional Questions:

- Are there other relationships or activities that readers could perceive to have influenced, or that give the appearance of potentially influencing, what you wrote in the submitted work?**  
No.
- What is the manuscript title?**  
arly Outpatient Remdesivir to Prevent Progression to Severe Covid-19
- Are you the corresponding author?**  
No.

## Certification

I certify that the information provided in this disclosure is complete and accurate.

Disclosure Purpose: 21-16846

Summary of Interests

**Company or Organization**

| Entity                                                                                                                                                                                                   | Type       | Interest Held By                                                                                                                    |
|----------------------------------------------------------------------------------------------------------------------------------------------------------------------------------------------------------|------------|-------------------------------------------------------------------------------------------------------------------------------------|
| Gilead Sciences, Inc.                                                                                                                                                                                    | Employment | Self                                                                                                                                |
| <i>Title:</i> Senior Director, Virology Clinical Development                                                                                                                                             |            | <i>Position Description:</i> Clinical development of therapeutics for viral disease (including remdesivir for SARS-CoV-2 infection) |
| <i>Additional Information:</i> Clinical lead and medical monitor for PINETREE study (GS-US-540-9012) evaluating efficacy and safety of 3-day IV RDV for treatment of high-risk individuals with COVID-19 |            |                                                                                                                                     |
| Gilead Sciences, Inc.                                                                                                                                                                                    | Stock      | Self                                                                                                                                |
| <i>Additional Information:</i>                                                                                                                                                                           |            |                                                                                                                                     |

Additional Questions:

- Are there other relationships or activities that readers could perceive to have influenced, or that give the appearance of potentially influencing, what you wrote in the submitted work?**  
No.
- What is the manuscript title?**  
Early Outpatient Remdesivir to Prevent Progression to Severe Covid-19
- Are you the corresponding author?**  
No.

Certification

I certify that the information provided in this disclosure is complete and accurate.

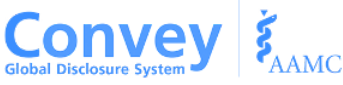

Disclosure Purpose: 21-16846

Summary of Interests

**Company or Organization**

| Entity                                                                                                                                       | Type             | Interest Held By                                                                |
|----------------------------------------------------------------------------------------------------------------------------------------------|------------------|---------------------------------------------------------------------------------|
| <a href="#">Agency for Health Care Policy and Research</a>                                                                                   | Grant / Contract | Self                                                                            |
| <i>Recipient Name:</i> Johns Hopkins University School of Medicine<br><i>Grant / Contract Description:</i><br><i>Additional Information:</i> |                  | <i>Recipient Type:</i> Institution<br><i>Grant / Contract Purpose:</i> Research |
| <a href="#">Artis Senior Living</a>                                                                                                          | Consultant       | Self                                                                            |
| <i>Category:</i> Consultant<br><i>Additional Information:</i> hourly rate                                                                    |                  | <i>Description:</i> Consulting on COVID- protocols and policies                 |
| <a href="#">Centers for Disease Control and Prevention</a>                                                                                   | Grant / Contract | Self                                                                            |
| <i>Recipient Name:</i> Johns Hopkins University School of Medicine<br><i>Grant / Contract Description:</i><br><i>Additional Information:</i> |                  | <i>Recipient Type:</i> Institution<br><i>Grant / Contract Purpose:</i> Research |

Additional Questions:

- Are there other relationships or activities that readers could perceive to have influenced, or that give the appearance of potentially influencing, what you wrote in the submitted work?**  
No.
- What is the manuscript title?**  
Early Outpatient Remdesivir to Prevent Progression to Severe Covid-19
- Are you the corresponding author?**  
No.

Certification

I certify that the information provided in this disclosure is complete and accurate.



**Disclosure Purpose:** 21-16846

## Summary of Interests

| Company or Organization                                                                                                                                                     |            |                                                      |
|-----------------------------------------------------------------------------------------------------------------------------------------------------------------------------|------------|------------------------------------------------------|
| Entity                                                                                                                                                                      | Type       | Interest Held By                                     |
| <a href="#">Gilead Sciences Inc</a>                                                                                                                                         | Consultant | Self                                                 |
| <i>Category:</i> Consultant<br><i>Additional Information:</i> I received a one time honorarium for participating in a panel for Gilead's COVID Patient-Centric Grand Rounds |            | <i>Description:</i> I received a one time honorarium |

## Additional Questions:

- Are there other relationships or activities that readers could perceive to have influenced, or that give the appearance of potentially influencing, what you wrote in the submitted work?**  
No.
- What is the manuscript title?**  
Early Outpatient Remdesivir to Prevent Progression to Severe Covid-19
- Are you the corresponding author?**  
No.

## Certification

I certify that the information provided in this disclosure is complete and accurate.

**Disclosure Purpose:** 21-16846

**Summary of Interests**

I do not have any interests to disclose at this time.

**Additional Questions:**

- 1. **Are there other relationships or activities that readers could perceive to have influenced, or that give the appearance of potentially influencing, what you wrote in the submitted work?**  
No.
- 2. **What is the manuscript title?**  
early outpatient remdesivir to prevent progression to severe Covid 19
- 3. **Are you the corresponding author?**  
No.

**Certification**

I certify that the information provided in this disclosure is complete and accurate.

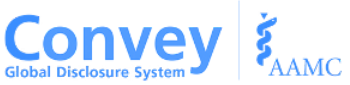

**Disclosure Purpose:** 21-16846

**Summary of Interests**

I do not have any interests to disclose at this time.

**Additional Questions:**

- 1. **Are there other relationships or activities that readers could perceive to have influenced, or that give the appearance of potentially influencing, what you wrote in the submitted work?**  
No.
- 2. **What is the manuscript title?**  
Early Outpatient Remdesivir to Prevent Progression to Severe Covid-19
- 3. **Are you the corresponding author?**  
No.

**Certification**

I certify that the information provided in this disclosure is complete and accurate.

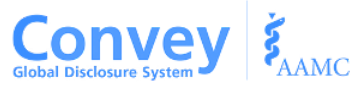

**Disclosure Purpose:** 21-16846

### Summary of Interests

I do not have any interests to disclose at this time.

### Additional Questions:

- Are there other relationships or activities that readers could perceive to have influenced, or that give the appearance of potentially influencing, what you wrote in the submitted work?**  
No.
- What is the manuscript title?**  
Early Outpatient Remdesivir to prevent progression to severe covid -19.
- Are you the corresponding author?**  
No.

### Certification

I certify that the information provided in this disclosure is complete and accurate.

Disclosure Purpose: 21-16846

## Summary of Interests

| Company or Organization                                        |            |                                                |
|----------------------------------------------------------------|------------|------------------------------------------------|
| Entity                                                         | Type       | Interest Held By                               |
| Gilead Sciences                                                | Employment | Self                                           |
| <i>Title:</i> Vice president<br><i>Additional Information:</i> |            | <i>Position Description:</i> Clinical research |
| Gilead Sciences                                                | Stock      | Self                                           |
| <i>Additional Information:</i>                                 |            |                                                |

## Additional Questions:

- Are there other relationships or activities that readers could perceive to have influenced, or that give the appearance of potentially influencing, what you wrote in the submitted work?**  
No.
- What is the manuscript title?**  
Early Outpatient Remdesivir to Prevent Progression to Severe Covid-19
- Are you the corresponding author?**  
No.

## Certification

I certify that the information provided in this disclosure is complete and accurate.

Disclosure Purpose: 21-16846

## Summary of Interests

| Entity                                                        | Type       | Interest Held By                                    |
|---------------------------------------------------------------|------------|-----------------------------------------------------|
| <a href="#">Gilead Sciences</a>                               | Consultant | Self                                                |
| <i>Category:</i> Consultant<br><i>Additional Information:</i> |            | <i>Description:</i> advisory board                  |
| <a href="#">Gilead Sciences</a>                               | Stock      | Self                                                |
| <i>Additional Information:</i>                                |            |                                                     |
| <a href="#">GlaxoSmithKline</a>                               | Stock      | Self                                                |
| <i>Additional Information:</i>                                |            |                                                     |
| <a href="#">Merck</a>                                         | Consultant | Self                                                |
| <i>Category:</i> Consultant<br><i>Additional Information:</i> |            | <i>Description:</i> advisory board                  |
| <a href="#">Pfizer</a>                                        | Stock      | Self                                                |
| <i>Additional Information:</i>                                |            |                                                     |
| <a href="#">ViiV Healthcare</a>                               | Consultant | Self                                                |
| <i>Category:</i> Consultant<br><i>Additional Information:</i> |            | <i>Description:</i> speaker program, advisory board |

## Additional Questions:

- Are there other relationships or activities that readers could perceive to have influenced, or that give the appearance of potentially influencing, what you wrote in the submitted work?**  
No.
- What is the manuscript title?**  
Early Outpatient Remdesivir to Prevent Progression to Severe COVID-19
- Are you the corresponding author?**  
No.

## Certification

I certify that the information provided in this disclosure is complete and accurate.

Disclosure Purpose: 21-16846

Summary of Interests

| Company or Organization                                                     |                  |                                              |
|-----------------------------------------------------------------------------|------------------|----------------------------------------------|
| Entity                                                                      | Type             | Interest Held By                             |
| Eli Lilly and Company                                                       | Other            | Self                                         |
| Category: Other<br>Additional Information:                                  |                  | Description: Scientific advisory board       |
| Gilead Sciences                                                             | Grant / Contract | Self                                         |
| Recipient Name:<br>Grant / Contract Description:<br>Additional Information: |                  | Recipient Type:<br>Grant / Contract Purpose: |
| Gilead Sciences                                                             | Other            | Self                                         |
| Category: Other<br>Additional Information:                                  |                  | Description: Scientific advisory board       |
| Merck                                                                       | Grant / Contract | Self                                         |
| Recipient Name:<br>Grant / Contract Description:<br>Additional Information: |                  | Recipient Type:<br>Grant / Contract Purpose: |
| Merck                                                                       | Other            | Self                                         |
| Category: Other<br>Additional Information:                                  |                  | Description: Scientific advisory board       |
| Theratechnologies Inc.                                                      | Other            | Self                                         |
| Category: Other<br>Additional Information:                                  |                  | Description: Scientific advisory board       |
| ViiV Healthcare                                                             | Grant / Contract | Self                                         |
| Recipient Name:<br>Grant / Contract Description:<br>Additional Information: |                  | Recipient Type:<br>Grant / Contract Purpose: |
| ViiV Healthcare                                                             | Other            | Self                                         |
| Category: Other<br>Additional Information:                                  |                  | Description: Scientific advisory board       |

Additional Questions:

- Are there other relationships or activities that readers could perceive to have influenced, or that give the appearance of potentially influencing, what you wrote in the submitted work?  
No.
- What is the manuscript title?  
Early Outpatient Remdesivir to Prevent Progression to Severe Covid-19
- Are you the corresponding author?  
No.

Certification

I certify that the information provided in this disclosure is complete and accurate.





**Disclosure Purpose:** 21-16846

**Summary of Interests**

I do not have any interests to disclose at this time.

**Additional Questions:**

- 1. **Are there other relationships or activities that readers could perceive to have influenced, or that give the appearance of potentially influencing, what you wrote in the submitted work?**  
No.
- 2. **What is the manuscript title?**  
Early Outpatient Remdesivir to Prevent Progression to Severe Covid-19
- 3. **Are you the corresponding author?**  
No.

**Certification**

I certify that the information provided in this disclosure is complete and accurate.



Disclosure Purpose: 21-16846

Summary of Interests

**Company or Organization**

| Entity                                                                                                                                                                                                                                                                                            | Type             | Interest Held By                                                                |
|---------------------------------------------------------------------------------------------------------------------------------------------------------------------------------------------------------------------------------------------------------------------------------------------------|------------------|---------------------------------------------------------------------------------|
| Gilead Sciences                                                                                                                                                                                                                                                                                   | Grant / Contract | Self                                                                            |
| <i>Recipient Name:</i> Fundacion SEIMC-GESIDA<br><i>Grant / Contract Description:</i> IN-ES-380-6205<br><i>Additional Information:</i> Simplified model of linkage & retention to care, using a mobile unit and a same-day test & treat approach among excluded population. The SIMPLIFIED Study. |                  | <i>Recipient Type:</i> Institution<br><i>Grant / Contract Purpose:</i> Research |

Additional Questions:

- Are there other relationships or activities that readers could perceive to have influenced, or that give the appearance of potentially influencing, what you wrote in the submitted work?**  
No.
- What is the manuscript title?**  
Early Outpatient Remdesivir to Prevent Progression to Severe Covid-19" to the New England Journal of Medicine
- Are you the corresponding author?**  
No.

Certification

I certify that the information provided in this disclosure is complete and accurate.

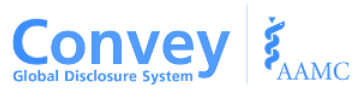

Disclosure Purpose: 21-16846

Summary of Interests

I do not have any interests to disclose at this time.

Additional Questions:

- 1. **Are there other relationships or activities that readers could perceive to have influenced, or that give the appearance of potentially influencing, what you wrote in the submitted work?**  
No.
- 2. **What is the manuscript title?**  
Early Outpatient Remdesivir to Prevent Progression to Severe Covid-19
- 3. **Are you the corresponding author?**  
No.

Certification

I certify that the information provided in this disclosure is complete and accurate.



**Disclosure Purpose:** 21-16846

## Summary of Interests

| Company or Organization                                                                                                                                |       |                             |
|--------------------------------------------------------------------------------------------------------------------------------------------------------|-------|-----------------------------|
| Entity                                                                                                                                                 | Type  | Interest Held By            |
| Gilead Sciences Inc                                                                                                                                    | Other | Self                        |
| <i>Category:</i> Other<br><i>Additional Information:</i> I helped assist Gilead in designing the clinical trial but was not compensated for this work/ |       | <i>Description:</i> Advisor |

## Additional Questions:

- Are there other relationships or activities that readers could perceive to have influenced, or that give the appearance of potentially influencing, what you wrote in the submitted work?**  
No.
- What is the manuscript title?**  
Early Outpatient Remdesivir to Prevent Progression to Severe Covid-19
- Are you the corresponding author?**  
No.

## Certification

I certify that the information provided in this disclosure is complete and accurate.

Disclosure Purpose: 21-16846

## Summary of Interests

### Company or Organization

| Entity                                                                                                                                                                                                      | Type             | Interest Held By                                                                |
|-------------------------------------------------------------------------------------------------------------------------------------------------------------------------------------------------------------|------------------|---------------------------------------------------------------------------------|
| <a href="#">Genentech USA, Inc.</a>                                                                                                                                                                         | Grant / Contract | Self                                                                            |
| <i>Recipient Name:</i> Kaiser Foundation Research Institute<br><i>Grant / Contract Description:</i> Research contract to conduct COVID-19 related research<br><i>Additional Information:</i>                |                  | <i>Recipient Type:</i> Institution<br><i>Grant / Contract Purpose:</i> Research |
| <a href="#">Gilead Sciences Inc</a>                                                                                                                                                                         | Grant / Contract | Self                                                                            |
| <i>Recipient Name:</i> Kaiser Foundation Research Institute<br><i>Grant / Contract Description:</i> Funding for participants recruitment and follow-up for clinical trial<br><i>Additional Information:</i> |                  | <i>Recipient Type:</i> Institution<br><i>Grant / Contract Purpose:</i> Research |
| <a href="#">Karyopharm Therapeutics Inc.</a>                                                                                                                                                                | Grant / Contract | Self                                                                            |
| <i>Recipient Name:</i> Kaiser Foundation Research Institute<br><i>Grant / Contract Description:</i> Funding to enroll patients in a clinical trial<br><i>Additional Information:</i>                        |                  | <i>Recipient Type:</i> Institution<br><i>Grant / Contract Purpose:</i> Research |

## Additional Questions:

- Are there other relationships or activities that readers could perceive to have influenced, or that give the appearance of potentially influencing, what you wrote in the submitted work?  
No.
- What is the manuscript title?  
Early Outpatient Remdesivir to Prevent Progression to Severe Covid-19
- Are you the corresponding author?  
No.

## Certification

I certify that the information provided in this disclosure is complete and accurate.

**Disclosure Purpose:** 21-16846

**Summary of Interests**

I do not have any interests to disclose at this time.

**Additional Questions:**

- 1. Are there other relationships or activities that readers could perceive to have influenced, or that give the appearance of potentially influencing, what you wrote in the submitted work?**  
No.
- 2. What is the manuscript title?**  
Early outpatient Remdesivir to prevent progression of Covid19
- 3. Are you the corresponding author?**  
No.

**Certification**

I certify that the information provided in this disclosure is complete and accurate.

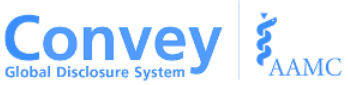

**Disclosure Purpose:** 21-16846

## Summary of Interests

| Entity                                                                                                                                                                          | Type             | Interest Held By                                                               |
|---------------------------------------------------------------------------------------------------------------------------------------------------------------------------------|------------------|--------------------------------------------------------------------------------|
| <a href="#">AbbVie Biotherapeutics</a>                                                                                                                                          | Other            | Other - Institutional support; I received no direct remuneration for effort    |
| <i>Category:</i> Other<br><i>Additional Information:</i>                                                                                                                        |                  | <i>Description:</i> Site investigator for COVID therapeutic clinical trial     |
| <a href="#">Agency for Healthcare Research and Quality</a>                                                                                                                      | Grant / Contract | Self                                                                           |
| <i>Recipient Name:</i> Brandon Webb<br><i>Grant / Contract Description:</i> R03 grant to study Clostridioides difficile<br><i>Additional Information:</i> Unrelated to COVID-19 |                  | <i>Recipient Type:</i> Individual<br><i>Grant / Contract Purpose:</i> Research |
| <a href="#">Genentech</a>                                                                                                                                                       | Other            | Other - Institutional support; I received no direct remuneration for effort    |
| <i>Category:</i> Other<br><i>Additional Information:</i>                                                                                                                        |                  | <i>Description:</i> Site investigator for COVID therapeutic clinical trial     |
| <a href="#">National Institutes of Health</a>                                                                                                                                   | Other            | Other - Institutional support; I received no direct remuneration for effort    |
| <i>Category:</i> Other<br><i>Additional Information:</i>                                                                                                                        |                  | <i>Description:</i> Site Investigator for ACTIV COVID Trials                   |
| <a href="#">Regeneron Pharmaceuticals</a>                                                                                                                                       | Other            | Other - Institutional support; I received no direct remuneration for effort    |
| <i>Category:</i> Other<br><i>Additional Information:</i>                                                                                                                        |                  | <i>Description:</i> Site investigator for COVID therapeutic trial              |

## Additional Questions:

- Are there other relationships or activities that readers could perceive to have influenced, or that give the appearance of potentially influencing, what you wrote in the submitted work?**  
No.
- What is the manuscript title?**  
Early Outpatient Remdesivir to Prevent Progression to Severe Covid-19
- Are you the corresponding author?**  
No.

## Certification

I certify that the information provided in this disclosure is complete and accurate.
